# Supplementary material
Source: PubMed Central journal article supplement (PMC7790206)
Supplement: ASN.2020060806SupplementaryData1.pdf [file ASN.2020060806SupplementaryData1.pdf]

Supplemental Data for

## **Kidney single-cell atlas reveals myeloid heterogeneity in progression and regression of kidney disease**

Bryan R Conway<sup>1\*</sup>, Eoin D O'Sullivan<sup>2\*</sup>, Carolynn Cairns<sup>1</sup>, James O'Sullivan<sup>1</sup>, Daniel J. Simpson<sup>3</sup>, Angela Salzano<sup>3</sup>, Katie Connor<sup>1,2</sup>, Peng Ding<sup>2</sup>, Duncan Humphries<sup>2</sup>, Kevin Stewart<sup>1</sup>, Oliver Teenan<sup>1</sup>, Riinu Pius<sup>4</sup>, Neil C Henderson<sup>2</sup>, Cecile Benezech<sup>1</sup>, Prakash Ramachandran<sup>2</sup>, David Ferenbach<sup>2</sup>, Jeremy Hughes<sup>2#</sup>, Tamir Chandra<sup>3#</sup> and Laura Denby<sup>1#</sup>.

<sup>1</sup> Centre for Cardiovascular Science, Queen's Medical Research Institute, University of Edinburgh, Edinburgh, UK. <sup>2</sup> MRC Centre for Inflammation Research, Queen's Medical Research Institute, University of Edinburgh, Edinburgh, UK. <sup>3</sup> Institute of Genetics and Molecular Medicine, University of Edinburgh <sup>4</sup> Centre for Medical Informatics, Edinburgh, United Kingdom.

\* joint first author

# joint senior author

**Short running title: Myeloid cells in kidney injury and repair**

# Table of Contents

|                          |    |
|--------------------------|----|
| Supp Fig 1               | 3  |
| Supp Fig 2               | 4  |
| Supp Fig 3               | 6  |
| Supp Fig 4               | 8  |
| Supp Table 1             | 9  |
| Supp Table 2             | 10 |
| Supp Table 3             | 11 |
| Figure and Table Legends | 12 |

# Supp Fig 1

A

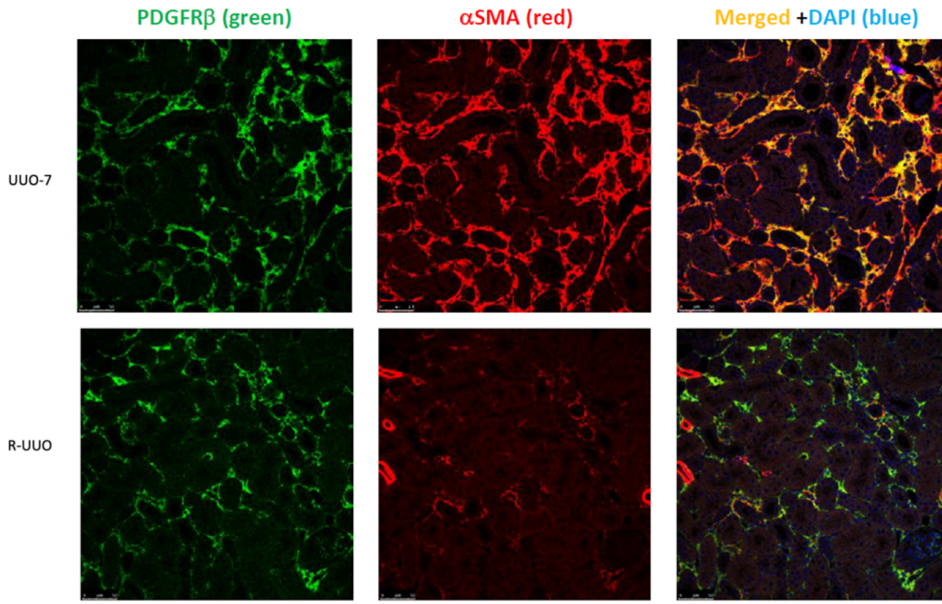

B

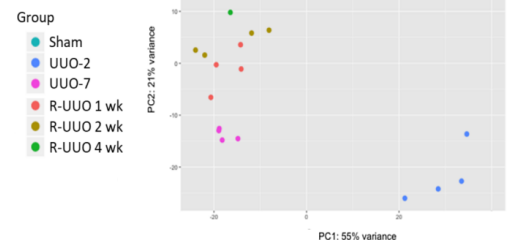

C

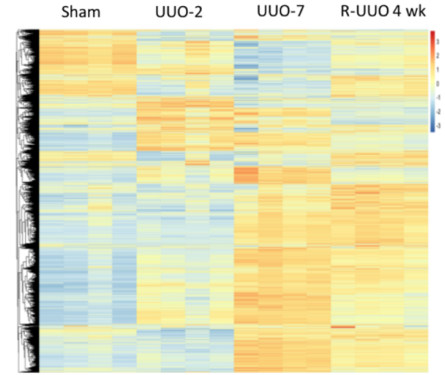

D

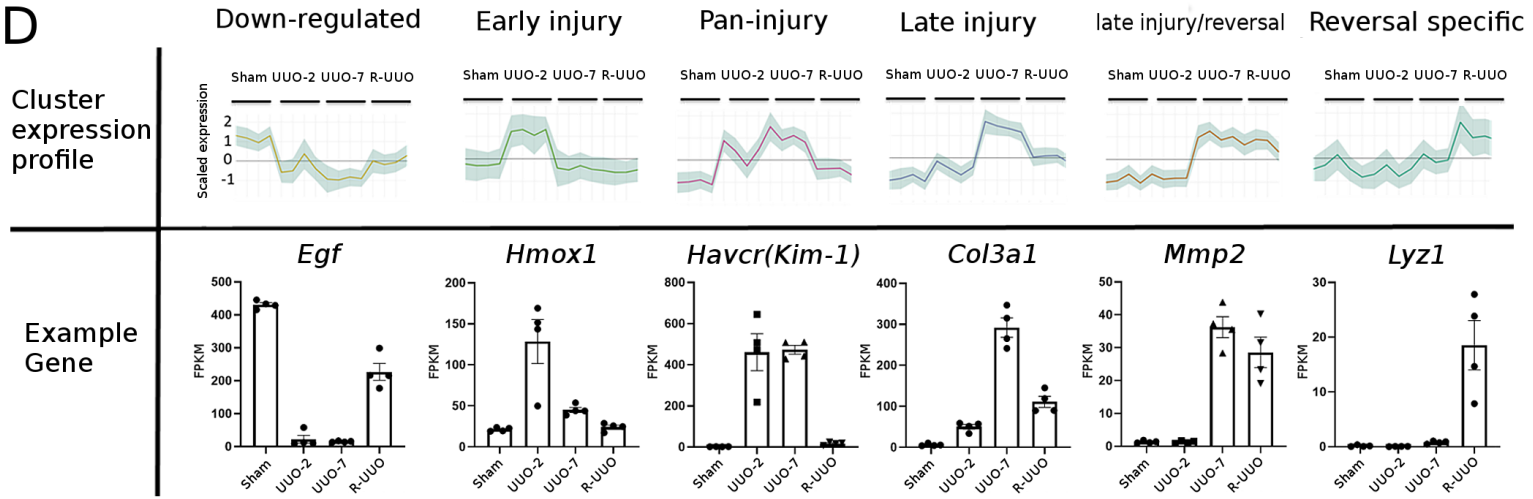

E

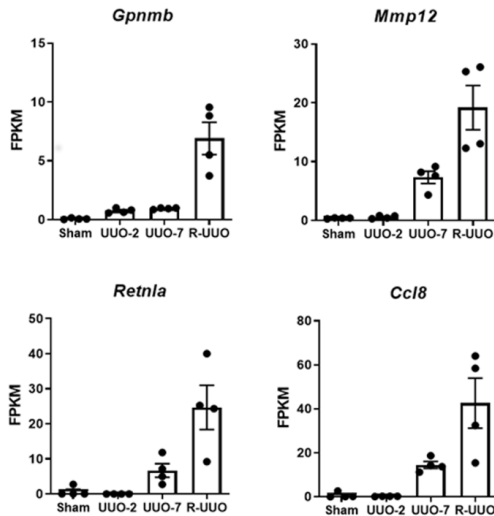

F

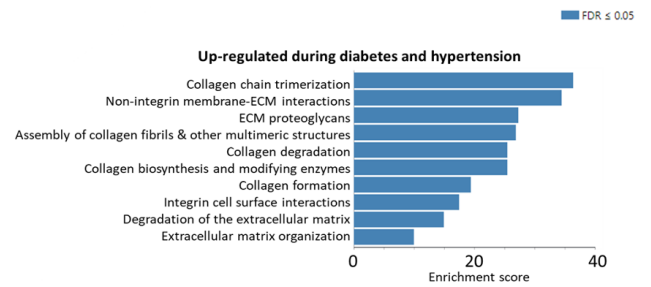

G

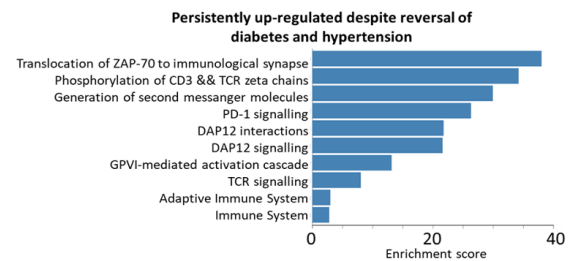

A

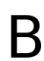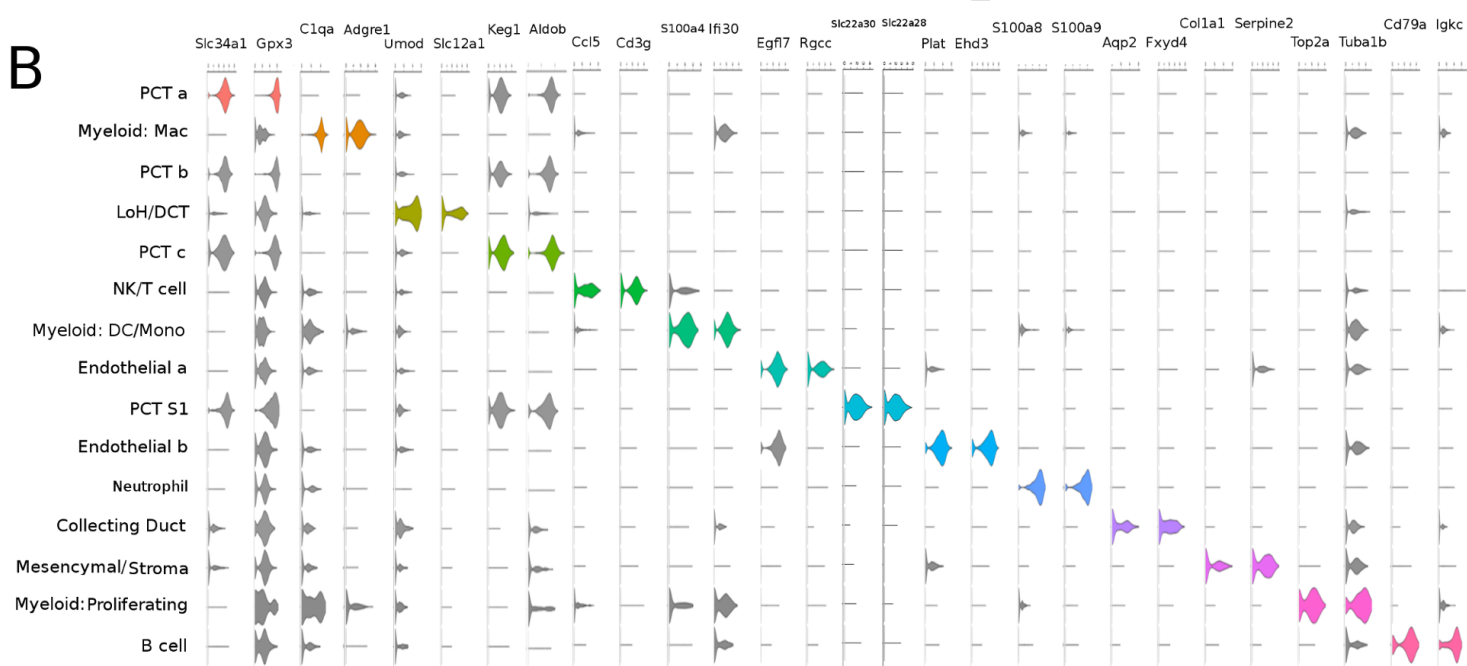



Supp Fig 3 A

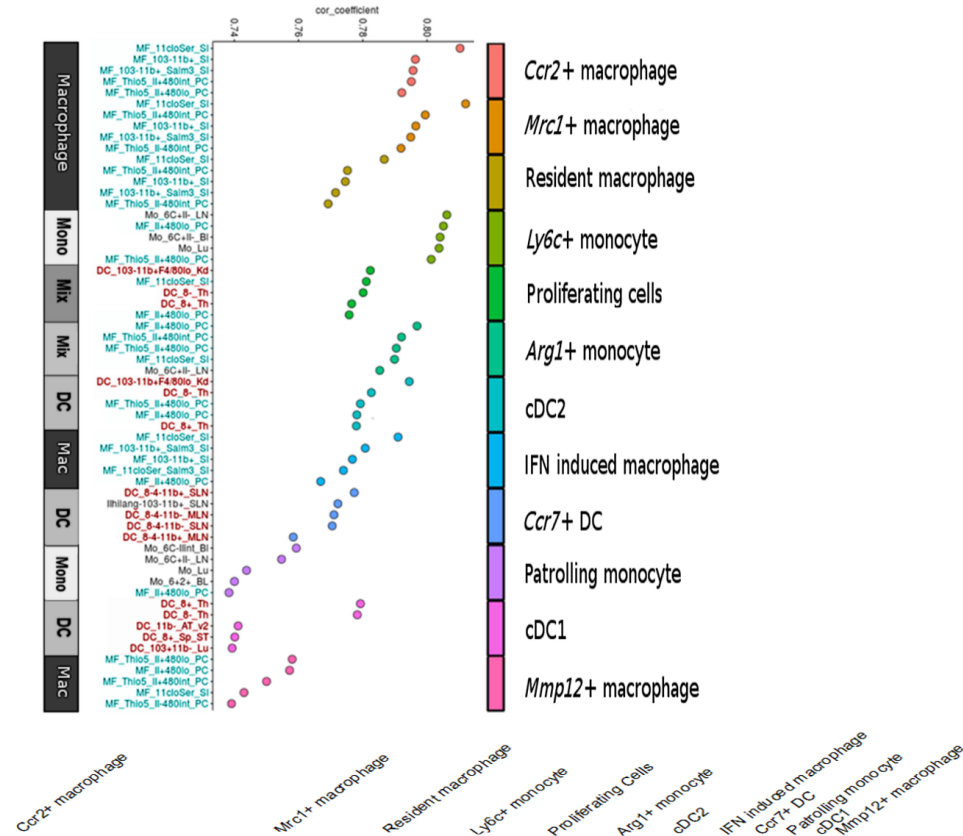

B

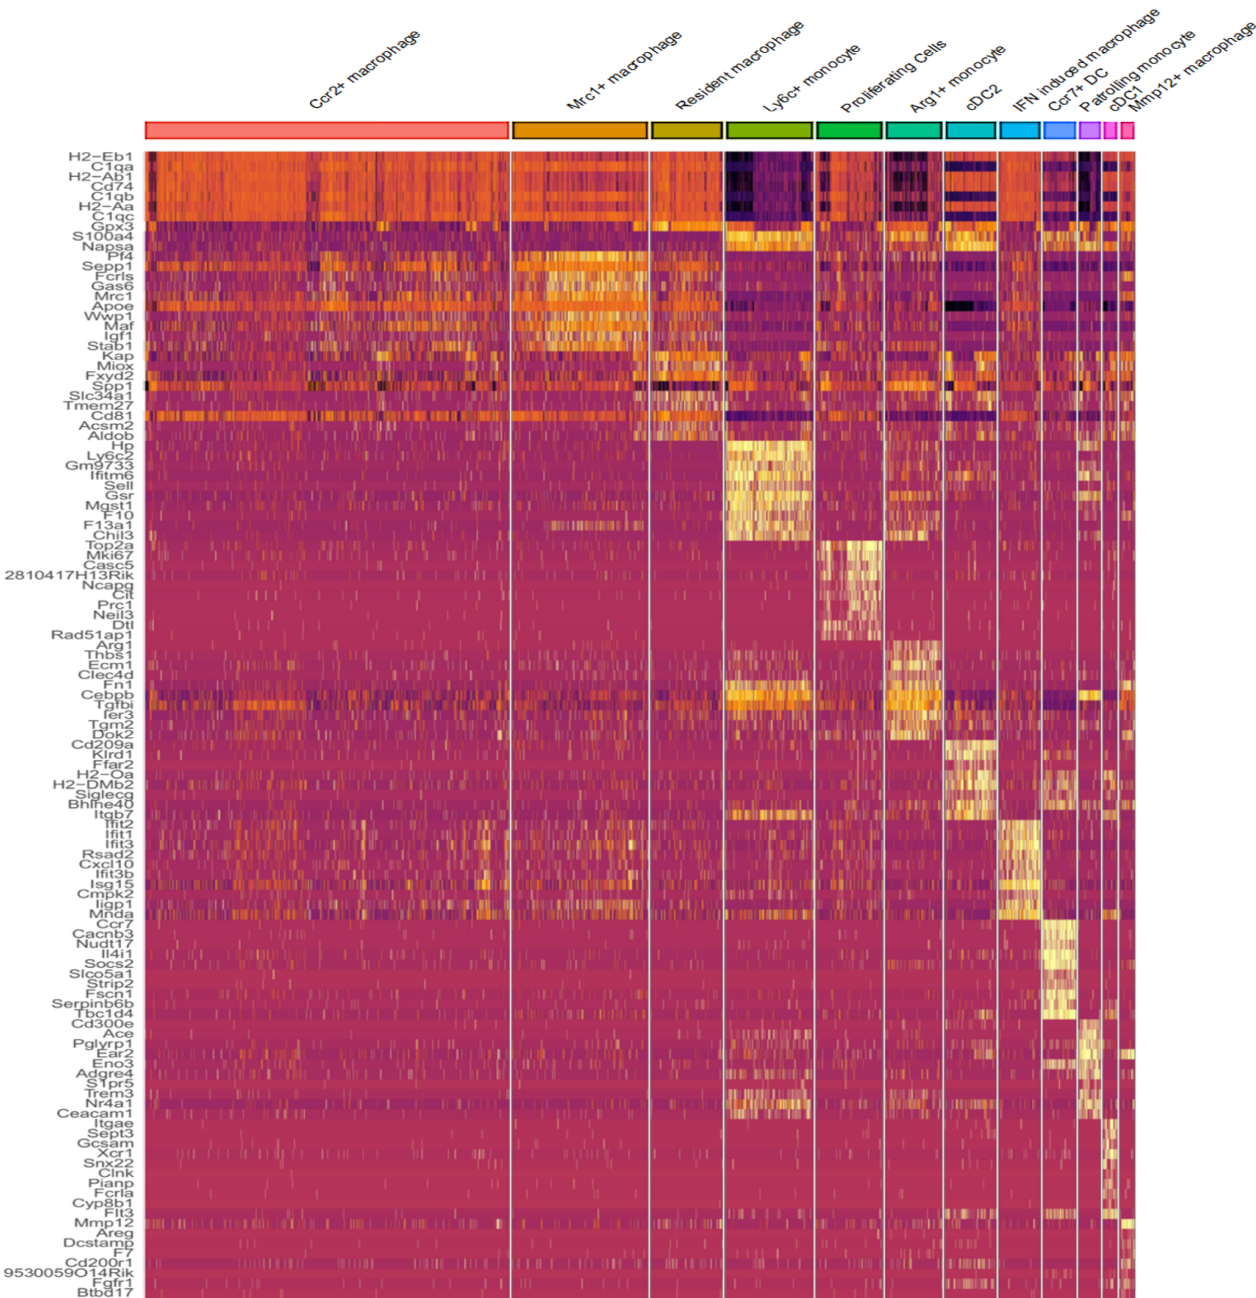



# Supp Fig 4

A

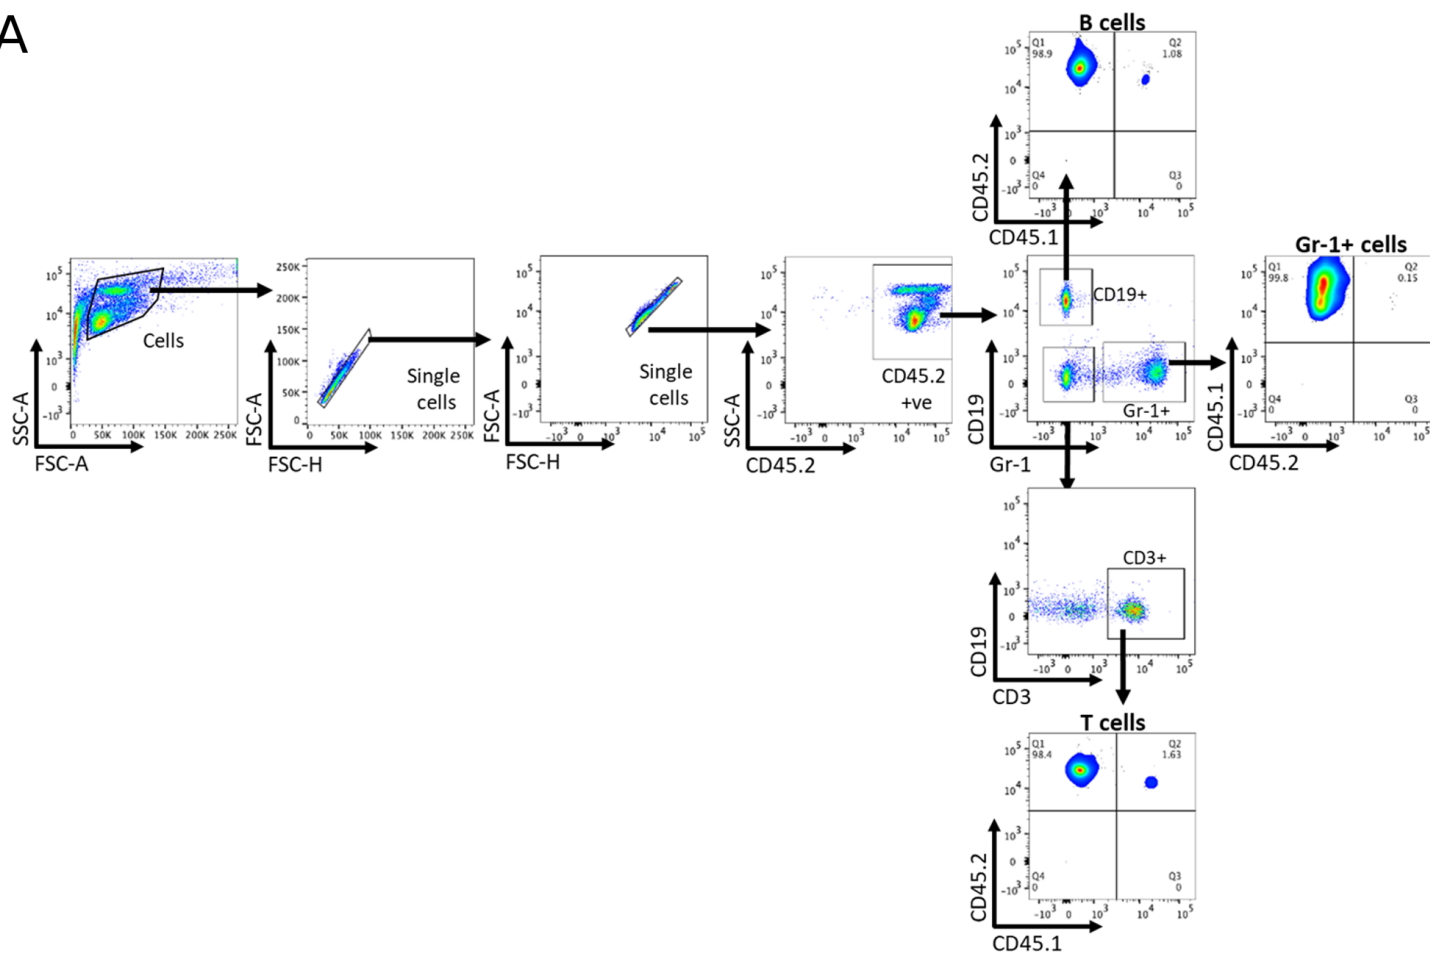

B

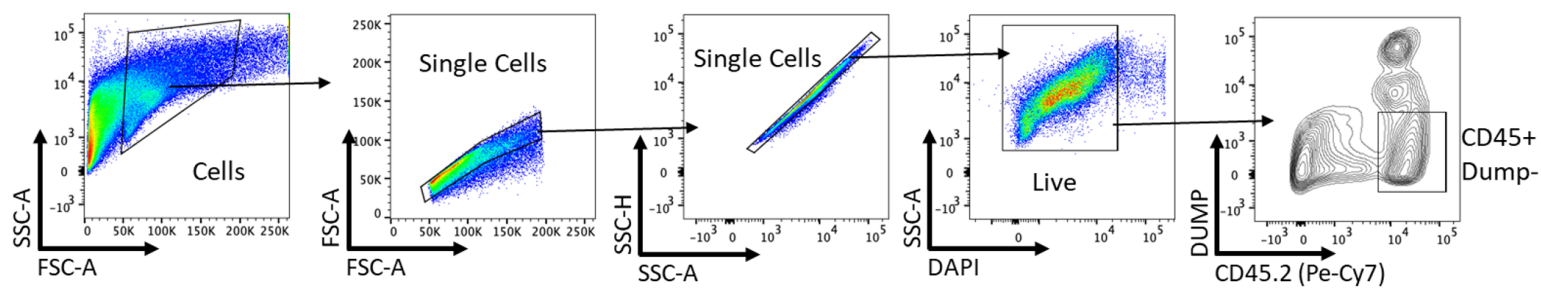

| <b>Antibody</b>                 | <b>Company/Cat Num/Dilution</b> |
|---------------------------------|---------------------------------|
| <b>Collagen III</b>             | Southern Biotech/1330-08/1:200  |
| <b>PDGFR-<math>\beta</math></b> | Abcam/ab32570/1:500             |
| <b><math>\alpha</math>-SMA</b>  | Abcam/ab5694/1:400              |
| <b>F4/80</b>                    | Abcam/ab16911/1:100             |
| <b>YM1 (Chil3)</b>              | Stemcell/60130/1:500            |
| <b>Mannose Receptor</b>         | R&D/AF2535/1:200                |
| <b>Mmp12</b>                    | Santa Cruz/sc390863/1:100       |
| <b>Anti-rabbit biotinylated</b> | Vector Labs/BA1000/1:300        |
| <b>Anti-goat biotinylated</b>   | Vector Labs/BA5000/1:300        |
| <b>Anti-rat biotinylated</b>    | Vector Labs/BA9400/1:300        |
| <b>Anti-rabbit AF555</b>        | ThermoFisher/A-11034/1:200      |
| <b>Anti-goat AF488</b>          | ThermoFisher/A-11055/1:200      |
| <b>Anti-mouse AF488</b>         | ThermoFisher/A-11029/1:200      |
| <b>Anti-rat AF488</b>           | ThermoFisher/A-21434/1:200      |

Supp Table 1. Antibodies utilised in immunohistochemistry/immunofluorescence studies

| Gene                | Probe/Assay ID |
|---------------------|----------------|
| <b><i>Mmp12</i></b> | Mm00500554_m1  |
| <b><i>Gpnmb</i></b> | Mm01328587_m1  |
| <b><i>Lyz1</i></b>  | Mm00657323_m1  |
| <b><i>Hprt</i></b>  | Mm00446968_m1  |

Supp Table 2. Taqman probes used for qRT-PCR in studies

| Antibody                       | Clone/Fluorochrome/final concentration              |
|--------------------------------|-----------------------------------------------------|
| <b>Live</b>                    | DAPI / 1:1000                                       |
| <b>CD45</b>                    | 30-F11/BV650 or APC/1:100                           |
| <b>CD45.1</b>                  | A20/FITC/1:200 K or 1:100 blood                     |
| <b>CD45.2</b>                  | 104/Pe-Cy7/1:200 K or 1:100 blood                   |
| <b>F4/80</b>                   | BM8/Pe-Cy7 or APC / 1:100 or 1:200 K or 1:100 blood |
| <b>MHCII</b>                   | M5-114.15.2/APC-Cy7 / 1:400                         |
| <b>Ly6G</b>                    | 1A8/BV421 / 1:200                                   |
| <b>Ly6C</b>                    | HK1.4/AF700 / 1:200                                 |
| <b>CD11b</b>                   | M1_70/PE Dazzle / 1:1000                            |
| <b>CD11c</b>                   | N418/BV605 / 1:100                                  |
| <b>CD64</b>                    | X54-5/7.1/PerCp5.5/1:200                            |
| <b>CD24</b>                    | 30-F1/PE/1:200                                      |
| <b>Siglec-F</b>                | E50-2440/BV421/1:200                                |
| <b>TCR<math>\beta</math></b>   | H57-597/BV421/1:200                                 |
| <b>CD19</b>                    | 6D5/BV421/1:200                                     |
| <b>CD3</b>                     | 17A2/PerCp5.5 1:100                                 |
| <b>CD206</b>                   | MR5D3/APC / 1:200                                   |
| <b>GR-1</b>                    | RB6-8C5/PE/1:200                                    |
| <b>CCR2</b>                    | SA203G11/BV605/1:200                                |
| <b>PDGFR<math>\beta</math></b> | APB5/PE/1:50                                        |
| <b>CD31</b>                    | 390/BV605/1:100                                     |
| <b>LTL</b>                     | FL-1321/FITC/1:200                                  |

Supp Table 3. Antibodies used in flow cytometry

### Supplemental Figure 1

**A** Immunofluorescence for PDGFR- $\beta^+$  and  $\alpha$ -SMA $^+$  indicates that a proportion of PDGFR- $\beta^+$  cells co-express  $\alpha$ -SMA $^+$  at UUO-7 indicating activation to myofibroblasts; 1 week following R-UUO, the interstitial PDGFR- $\beta^+$  cells no longer express  $\alpha$ -SMA $^+$ , which is now restricted to the arterial smooth muscle walls. **B** Principal component (PC) analysis of RNA sequencing data from bulk cortical kidney tissue from animals undergoing sham surgery, or at UUO-2, UUO-7, or 1- 2- or 4-weeks post R-UUO (n=4/time-point). **C** Heatmap of differentially expressed genes created using Pheatmap R package. Rows were clustered via unsupervised hierarchical clustering. **D** Expression of exemplar genes aligning to each cluster **E** Expression of *Gpnmb*, *Mmp12*, *Retnla* and *Ccl8* genes in RNAseq dataset **F** Pathways enriched for genes that are induced in the kidney of *Cyp1a1mRen2* rats during diabetes and hypertension, but which revert towards baseline following tight glycaemic and blood pressure control (52) **G** Pathways enriched for genes that are persistently elevated in the kidney of *Cyp1a1mRen2* rats despite onset of tight glycaemic and blood pressure control (52).

### Supplemental Figure 2

**A** Top 10 differentially expressed genes by fold change in each cluster, calculated using Wilcoxon signed-rank test. The colour scheme is based on z-score distribution. **B** Violin plots showing the expression levels of selected marker genes in each cluster. The x axis shows the log-scale normalized read count. **C** Top 10 differentially expressed genes by fold change in each cluster across the sham, UUO-2, UUO-7 and R-UUO (2 weeks) libraries analysed individually using Wilcoxon signed-rank test. The colour scheme is based on z-score distribution **D** Separate tSNE plots restricted to cells from each separate time-point coloured by shared nearest neighbour (SNN) allocated cluster, annotated by cell type **E** Flow cytometry was employed to determine the proportion of total kidney cells at each time point comprised by proximal tubular cells (PT), endothelial cells (EC), fibroblasts (PDGFR- $\beta$ ), immune cells (CD45), and F4/80<sup>Hi</sup> or F4/80<sup>Lo</sup> macrophages.

### Supplemental Figure 3

**A** Top 5 Immunological Genome Project (ImmGen) reference cell types per cluster ranked by Spearman's correlation coefficients with full dataset details following a cluster-to-references analysis using cluster identify predictor v2. **B** Top 10 differentially expressed genes by fold change per cluster, calculated using Wilcoxon signed-rank test. The colour scheme is based on z-score distribution **C** Consensus matrix of ImmGen reference cell types using SingleR generated labels (bottom) with final classifications **D** Violin plots of efferocytosis genes across the myeloid cell clusters. The y-axis shows the log-scale normalized read count.

#### **Supplemental Figure 4**

**A** Flow cytometry gating strategy for characterizing circulating blood immune cells into B-cells (CD19<sup>+</sup>), monocyte/neutrophils (Gr-1<sup>+</sup>), and T-cells (CD3<sup>+</sup>) using the D2 blood sample as an exemplar. **B** Flow cytometry gating strategy for sorting myeloid cells in the kidney. Lineage dump gate includes TCR $\beta$ , CD19, Ly6G and SiglecF all on the same fluorophore to exclude T-cells, B-cells, neutrophils and eosinophils respectively.

#### **Supplemental Table 1**

Antibodies utilised in immunohistochemistry/immunofluorescence studies.

#### **Supplemental Table 2**

Taqman probes used for qRT-PCR in studies.

#### **Supplemental Table 3**

Antibodies utilised in Flow Cytometry

#### **Supplemental Table 4**

Summary of 10x sequencing statistics

#### **Supplemental Table 5**

Bulk RNA-Seq matrix of differentially expressed genes in each gene cluster, expressed in FKPM.

**Supplemental Table 6**

Single cell RNA-Seq table of differentially expressed genes in the global data as described in Fig. 2, expressed per cluster, where avg\_logFC is the average log fold change between the cluster in question and the remaining clusters, pct.1 and pct.2 is the percentage of cells expressing the gene in question in the cluster in question the remaining clusters, and p\_val\_adj is the adjusted P-value following Bonferroni correction for multiple hypothesis testing.

**Supplemental Table 7**

Single cell RNA-Seq table of differentially expressed genes in the myeloid only data as described in Fig. 3, expressed per cluster, where avg\_logFC is the average log fold change between the cluster in question and the remaining clusters, pct.1 and pct.2 is the percentage of cells expressing the gene in question in the cluster in question the remaining clusters, and p\_val\_adj is the adjusted P-value following Bonferroni correction for multiple hypothesis testing and rank is the assigned rank for gene set enrichment analysis calculation.
